# Supplementary material for: Delivery timing determines senomorphic efficacy: delayed local ruxolitinib restores macrophage polarization and rescues age-impaired bone repair
Source: Research Square preprint supplement (doi:10.21203/rs.3.rs-9624236/v1), 2026-05-22
Supplement: Supplementary file 1 [file 62f325a10fec6db1bb6833c6.pdf]

**Delivery timing determines senomorphic efficacy: delayed local ruxolitinib restores macrophage polarization and rescues age-impaired bone repair**

Yamin Liu<sup>1</sup>, Erin M. O'Brien<sup>2</sup>, Christy Lottinger<sup>1</sup>, Govindaraj Perumal<sup>1</sup>, Kara L. Spiller<sup>2</sup>, Liisa Kuhn<sup>1\*</sup>

<sup>1</sup>Department of Biomedical Engineering, University of Connecticut Health Center, Farmington, CT 06030

<sup>2</sup>School of Biomedical Engineering, Science, and Health Systems, Drexel University, Philadelphia, PA

\*=communicating author

**Table1: Top 30 differentially expressed genes at Day 1**

| DAY1      |                 |                 |                    |                    |                      |           |                       |          |                         |          |                       |           |                         |          |                         |          |
|-----------|-----------------|-----------------|--------------------|--------------------|----------------------|-----------|-----------------------|----------|-------------------------|----------|-----------------------|-----------|-------------------------|----------|-------------------------|----------|
| Gene Name | Log 10 (M0-TBL) | Log 10 (M1-TBL) | log 10 (Rux - Imm) | Log 10 (Rux - Del) | D1-M1-TBL vs. M0-TBL |           | D1-Rux-Imm vs. M0-TBL |          | D1-Rux-Delay vs. M0-TBL |          | D1-RUX-Imm vs. M1-TBL |           | D1-Rux-Delay vs. M1-TBL |          | D1-Rux-Delay vs Rux-Imm |          |
|           |                 |                 |                    |                    | P value              | q value   | P value               | q value  | P value                 | q value  | P value               | q value   | P value                 | q value  | P value                 | q value  |
|           |                 |                 |                    |                    |                      |           |                       |          |                         |          |                       |           |                         |          |                         |          |
| CCL2      | 3.096           | 3.974           | 3.01               | 3.989              | <0.000001            | 0.000001  | 0.176287              | 0.095136 | <0.000001               | 0.000002 | 0.000049              | 0.000053  | 0.201468                | 0.346147 | 0.000049                | 0.000046 |
| CCL5      | 3.231           | 4.198           | 4.47               | 4.232              | <0.000001            | 0.000001  | <0.000001             | 0.000002 | <0.000001               | 0.000002 | <0.000001             | 0.000003  | 0.009205                | 0.044503 | 0.000008                | 0.000014 |
| CCL7      | 2.392           | 3.146           | 2.31               | 3.216              | <0.000001            | 0.000002  | 0.004595              | 0.003963 | <0.000001               | 0.000002 | <0.000001             | 0.000002  | 0.003552                | 0.025549 | <0.000001               | 0.000002 |
| CCL8      | 1.316           | 3.183           | 0.386              | 3.221              | 0.000024             | 0.000039  | 0.016089              | 0.011956 | 0.000022                | 0.000031 | 0.000209              | 0.000157  | 0.008357                | 0.042416 | 0.000198                | 0.000137 |
| CCN2 (C   | 2.737           | 2.989           | 3.451              | 2.891              | 0.000303             | 0.00026   | 0.000002              | 0.000019 | 0.003333                | 0.001805 | 0.000028              | 0.000035  | 0.024662                | 0.084667 | 0.000022                | 0.000026 |
| CD71      | 3.228           | 2.571           | 2.928              | 2.526              | 0.000004             | 0.00001   | 0.000259              | 0.000371 | 0.00001                 | 0.000019 | 0.000126              | 0.000109  | 0.14803                 | 0.284957 | 0.000183                | 0.000129 |
| CD74      | 3.197           | 3.569           | 3.439              | 3.622              | 0.000004             | 0.00001   | 0.000012              | 0.000054 | 0.000002                | 0.000006 | 0.000091              | 0.000087  | 0.004178                | 0.025549 | 0.000016                | 0.000021 |
| CD83      | 2.056           | 2.946           | 1.819              | 2.943              | <0.000001            | 0.000001  | 0.000303              | 0.000418 | <0.000001               | 0.000002 | <0.000001             | 0.000003  | 0.806487                | 0.783047 | <0.000001               | 0.000002 |
| CD86      | 2.123           | 3.41            | 1.887              | 3.464              | <0.000001            | <0.000001 | 0.078467              | 0.046503 | <0.000001               | 0.000001 | 0.000109              | 0.0001    | 0.001567                | 0.021468 | 0.000096                | 0.000073 |
| COL1A1    | 2.646           | 2.466           | 3.26               | 2.368              | 0.000353             | 0.00029   | 0.000004              | 0.000026 | 0.000082                | 0.000081 | 0.000003              | 0.000007  | 0.008584                | 0.042491 | 0.000002                | 0.000006 |
| COL3A1    | 2.744           | 2.548           | 3.217              | 2.415              | 0.000424             | 0.000333  | 0.000002              | 0.000024 | 0.000043                | 0.000051 | 0.000001              | 0.000005  | 0.002001                | 0.022056 | <0.000001               | 0.000002 |
| CXCL10    | 2.761           | 3.617           | 1.35               | 3.661              | 0.000004             | 0.00001   | 0.000428              | 0.000552 | 0.000002                | 0.000007 | 0.000064              | 0.000064  | 0.00994                 | 0.046967 | 0.000058                | 0.000051 |
| CXCL12    | 1.279           | 1.183           | 1.631              | 0.831              | 0.510844             | 0.174694  | 0.002637              | 0.002426 | 0.066024                | 0.025926 | 0.029589              | 0.012945  | 0.181674                | 0.320084 | 0.011211                | 0.005023 |
| CXCL2     | 3.098           | 2.865           | 3.418              | 2.777              | 0.000338             | 0.000283  | 0.000947              | 0.00104  | 0.000189                | 0.00014  | 0.00011               | 0.0001    | 0.021694                | 0.081579 | 0.000078                | 0.000061 |
| CXCL3     | 3.306           | 2.462           | 3.912              | 2.452              | <0.000001            | 0.000003  | 0.000001              | 0.000015 | 0.000004                | 0.00001  | <0.000001             | <0.000001 | 0.706555                | 0.718901 | <0.000001               | 0.000002 |
| Cxcl1     | 2.738           | 2.71            | 3.332              | 2.614              | 0.265013             | 0.102366  | 0.000114              | 0.000219 | 0.004549                | 0.002328 | 0.000058              | 0.00006   | 0.001111                | 0.020825 | 0.000032                | 0.000036 |
| H2-Aa     | 2.795           | 3.23            | 3.222              | 3.305              | 0.000018             | 0.000032  | 0.000004              | 0.00003  | 0.000008                | 0.000015 | 0.670141              | 0.221871  | 0.021974                | 0.081579 | 0.006373                | 0.002989 |
| HIF1a     | 3.236           | 3.978           | 3.668              | 4.002              | <0.000001            | 0.000003  | 0.000005              | 0.000032 | <0.000001               | 0.000002 | 0.000016              | 0.000026  | 0.076923                | 0.185956 | 0.000007                | 0.000013 |
| IL36g     | 2.499           | 2.511           | 2.598              | 2.567              | 0.574963             | 0.193079  | 0.004479              | 0.003934 | 0.022356                | 0.009477 | 0.027345              | 0.012108  | 0.105096                | 0.229994 | 0.263982                | 0.093794 |
| IL6       | 1.644           | 3.073           | 1.743              | 2.878              | 0.000011             | 0.000022  | 0.39863               | 0.18337  | 0.000025                | 0.000032 | 0.000183              | 0.000142  | 0.012328                | 0.055461 | 0.000366                | 0.000226 |
| ISG15     | 3.533           | 4.216           | 2.37               | 4.199              | 0.000001             | 0.000004  | 0.000102              | 0.000203 | <0.000001               | 0.000003 | 0.000016              | 0.000026  | 0.267082                | 0.399471 | 0.000017                | 0.000022 |
| lrf7      | 3.366           | 3.811           | 1.668              | 3.813              | 0.000016             | 0.00003   | 0.000091              | 0.000195 | 0.00001                 | 0.000018 | 0.000035              | 0.00004   | 0.850795                | 0.807672 | 0.000035                | 0.000038 |
| Ly6C      | 3.129           | 3.299           | 2.28               | 3.406              | 0.00007              | 0.000094  | <0.000001             | 0.000002 | 0.000076                | 0.000077 | <0.000001             | <0.000001 | 0.004098                | 0.025549 | <0.000001               | 0.000002 |
| Pd11 (CD  | 3.462           | 4.106           | 3.254              | 4.144              | <0.000001            | 0.000001  | 0.000383              | 0.000507 | <0.000001               | 0.000002 | 0.000001              | 0.000005  | 0.000756                | 0.020825 | <0.000001               | 0.000003 |
| STAT1     | 3.444           | 3.528           | 2.692              | 3.598              | 0.000896             | 0.000602  | <0.000001             | 0.000002 | 0.000181                | 0.000139 | <0.000001             | <0.000001 | 0.003775                | 0.025549 | <0.000001               | 0.000002 |
| STAT3     | 2.721           | 3.427           | 2.691              | 3.413              | <0.000001            | 0.000003  | 0.097139              | 0.055855 | <0.000001               | 0.000002 | 0.000001              | 0.000005  | 0.256578                | 0.38654  | <0.000001               | 0.000002 |
| TLR9      | 1               | 2.493           | 0.577              | 2.558              | 0.000421             | 0.000333  | 0.302122              | 0.15524  | 0.000325                | 0.000222 | 0.004559              | 0.002446  | 0.205842                | 0.346147 | 0.003976                | 0.001984 |
| TNF       | 3.013           | 2.874           | 2.745              | 2.902              | 0.002698             | 0.001572  | 0.000303              | 0.000418 | 0.00621                 | 0.002964 | 0.000774              | 0.000486  | 0.064408                | 0.163785 | 0.000386                | 0.000234 |
| CHIL3 (Y  | 2.634           | 2.37            | 2.992              | 2.305              | 0.000222             | 0.000197  | 0.000009              | 0.000047 | 0.000185                | 0.000139 | 0.000007              | 0.000014  | 0.093509                | 0.213631 | 0.00001                 | 0.000015 |
| L-Select  | 1.122           | 2.593           | 1.293              | 2.561              | 0.000129             | 0.000133  | 0.468256              | 0.210389 | 0.000139                | 0.000116 | 0.002365              | 0.001369  | 0.02419                 | 0.084667 | 0.002584                | 0.001334 |

**Table2: Top 30 differentially expressed genes at Day 6**

| Gene name | DAY6            |                 |                    |                    |                     |           |                      |          |                        |          |                       |          |                         |           |                          |         |
|-----------|-----------------|-----------------|--------------------|--------------------|---------------------|-----------|----------------------|----------|------------------------|----------|-----------------------|----------|-------------------------|-----------|--------------------------|---------|
|           | Log 10 (M0-TBL) | Log 10 (M1-TBL) | Log 10 (Rux - Imm) | Log 10 (Rux - Del) | D6-M1-TBL vs.M0-TBL |           | D6-Rux-Imm vs.M0-TBL |          | D6-Rux-Delay vs.M0-TBL |          | D6-RUX-Imm vs. M1-TBL |          | D6-RUX-Delay vs. M1-TBL |           | D6-Rux-Delay vs. Rux-Imm |         |
|           |                 |                 |                    |                    | P value             | q value   | P value              | q value  | P value                | q value  | P value               | q value  | P value                 | q value   | P value                  | q value |
|           |                 |                 |                    |                    |                     |           |                      |          |                        |          |                       |          |                         |           |                          |         |
| CCL2      | 2.981           | 4.189           | 3.622              | 3.375              | <0.000001           | <0.000001 | 0.000011             | 0.000025 | 0.000029               | 0.000077 | 0.000017              | 0.000068 | 0.000002                | 0.000004  | 0.00082                  | 0.001   |
| CCL5      | 2.16            | 4.219           | 3.342              | 2.903              | <0.000001           | <0.000001 | 0.000003             | 0.000011 | 0.000097               | 0.000156 | <0.000001             | 0.000008 | 0.000004                | 0.000007  | 0.00035                  | 0.0005  |
| CCL7      | 2.581           | 3.458           | 2.921              | 3.018              | <0.000001           | 0.000001  | 0.000324             | 0.000283 | 0.000015               | 0.00007  | 0.000033              | 0.0001   | 0.000002                | 0.000005  | 0.02236                  | 0.0162  |
| CCL8      | 0               | 2.474           | 2.263              | 2.409              | <0.000001           | <0.000001 | <0.000001            | 0.000002 | 0.000002               | 0.00003  | 0.001078              | 0.001359 | 0.346473                | 0.099866  | 0.08314                  | 0.0484  |
| CCN2 (C   | 3.526           | 3.293           | 3.376              | 3.824              | 0.000162            | 0.000077  | 0.000534             | 0.000403 | 0.000017               | 0.00007  | 0.007724              | 0.006712 | 0.000003                | 0.000006  | 3E-06                    | 3E-05   |
| CD71      | 2.861           | 2.441           | 2.456              | 2.893              | 0.000012            | 0.000009  | 0.000066             | 0.000087 | 0.164359               | 0.087897 | 0.554153              | 0.263484 | 0.00002                 | 0.000022  | 7.4E-05                  | 0.0002  |
| CD74      | 2.342           | 4.244           | 4.245              | 3.468              | <0.000001           | <0.000001 | <0.000001            | 0.000001 | 0.000001               | 0.00003  | 0.982847              | 0.414523 | 0.000006                | 0.000008  | 7E-06                    | 4E-05   |
| CD83      | 1.906           | 2.451           | 2.186              | 1.96               | 0.000203            | 0.00009   | 0.001253             | 0.000797 | 0.303747               | 0.150302 | 0.003053              | 0.003205 | 0.000647                | 0.000343  | 0.00732                  | 0.006   |
| CD86      | 1.753           | 3.318           | 2.484              | 2.029              | 0.000038            | 0.000024  | 0.000714             | 0.000516 | 0.029371               | 0.018732 | <0.000001             | 0.000008 | 0.000002                | 0.000005  | 0.0001                   | 0.0002  |
| COL1A1    | 3.556           | 2.439           | 3.484              | 4.064              | <0.000001           | <0.000001 | 0.02069              | 0.009754 | 0.000004               | 0.000032 | <0.000001             | 0.000012 | <0.000001               | <0.000001 | 6E-06                    | 4E-05   |
| COL3A1    | 3.728           | 2.578           | 3.42               | 4.171              | <0.000001           | 0.000001  | 0.000233             | 0.000224 | 0.000011               | 0.00006  | 0.000008              | 0.000038 | <0.000001               | 0.000002  | 6E-06                    | 4E-05   |
| CXCL10    | 1.144           | 3.619           | 2.724              | 2.232              | 0.000006            | 0.000006  | 0.000047             | 0.000068 | 0.000453               | 0.000487 | 0.000005              | 0.000029 | 0.000029                | 0.000029  | 0.00226                  | 0.0022  |
| CXCL12    | 2.319           | 1.579           | 1.993              | 3.702              | 0.000864            | 0.000316  | 0.000255             | 0.000242 | 0.000003               | 0.000032 | 0.008324              | 0.007111 | 0.000019                | 0.00002   | 2E-06                    | 3E-05   |
| CXCL2     | 1.696           | 2.17            | 2.07               | 2.044              | 0.000596            | 0.000232  | 0.00096              | 0.000652 | 0.002769               | 0.00227  | 0.03932               | 0.0266   | 0.050625                | 0.016178  | 0.55666                  | 0.2468  |
| CXCL3     | 2.029           | 1.838           | 2.071              | 2.407              | 0.000086            | 0.000044  | 0.326397             | 0.118426 | 0.00002                | 0.00007  | 0.00378               | 0.003773 | 0.000006                | 0.000009  | 0.00112                  | 0.0012  |
| Cxcl1     | 1.688           | 2.108           | 2.063              | 2.169              | 0.000417            | 0.000169  | 0.000846             | 0.000586 | 0.000071               | 0.000139 | 0.353868              | 0.182074 | 0.122793                | 0.037027  | 0.03674                  | 0.0231  |
| H2-Aa     | 1.776           | 3.801           | 3.842              | 3.095              | <0.000001           | <0.000001 | <0.000001            | 0.000004 | 0.000004               | 0.000032 | 0.019889              | 0.01432  | 0.000002                | 0.000005  | 3E-06                    | 3E-05   |
| HIF1a     | 3.381           | 3.603           | 3.596              | 3.615              | 0.000192            | 0.000088  | 0.000491             | 0.000374 | 0.0001                 | 0.000157 | 0.705528              | 0.320348 | 0.334475                | 0.097362  | 0.30542                  | 0.1508  |
| IL36g     | 0.558           | 2.43            | 1.832              | 0.626              | 0.004764            | 0.001466  | 0.018168             | 0.008683 | 0.887197               | 0.363751 | 0.000005              | 0.000029 | 0.003992                | 0.001575  | 0.01642                  | 0.0123  |
| IL6       | 1.48            | 2.226           | 1.691              | 1.675              | 0.000927            | 0.000334  | 0.069657             | 0.029983 | 0.193293               | 0.100864 | 0.000001              | 0.000014 | 0.003849                | 0.001529  | 0.87278                  | 0.3657  |
| ISG15     | 2.192           | 3.656           | 2.79               | 2.678              | 0.000007            | 0.000006  | 0.000216             | 0.000214 | 0.000509               | 0.000541 | <0.000001             | 0.000012 | <0.000001               | 0.000004  | 0.00123                  | 0.0013  |
| Irf7      | 2.211           | 3.803           | 3.204              | 2.904              | <0.000001           | <0.000001 | <0.000001            | 0.000004 | 0.000027               | 0.000076 | 0.000007              | 0.000035 | 0.000012                | 0.000014  | 0.00098                  | 0.0011  |
| Ly6C      | 2.412           | 3.793           | 3.537              | 3.232              | <0.000001           | <0.000001 | 0.000001             | 0.000006 | 0.000002               | 0.00003  | 0.000402              | 0.000634 | 0.000007                | 0.00001   | 0.00029                  | 0.0005  |
| Pd1 (CD   | 2.869           | 4.003           | 3.727              | 3.395              | <0.000001           | <0.000001 | <0.000001            | 0.000003 | 0.00002                | 0.00007  | 0.000034              | 0.0001   | 0.000012                | 0.000014  | 0.00017                  | 0.0003  |
| STAT1     | 2.625           | 3.923           | 3.852              | 3.417              | <0.000001           | <0.000001 | <0.000001            | 0.000002 | 0.000003               | 0.000032 | 0.005311              | 0.004867 | 0.000012                | 0.000014  | 2.3E-05                  | 9E-05   |
| STAT3     | 2.902           | 3.239           | 3.08               | 2.982              | 0.000012            | 0.000009  | 0.000039             | 0.000059 | 0.006422               | 0.00485  | 0.000375              | 0.0006   | 0.000176                | 0.000117  | 0.0044                   | 0.0038  |
| TLR9      | 0               | 2.258           | 1.613              | 0.813              | <0.000001           | <0.000001 | <0.000001            | 0.000005 | 0.000114               | 0.000171 | 0.000031              | 0.000099 | 0.000012                | 0.000014  | 0.00021                  | 0.0003  |
| TNF       | 1.777           | 2.908           | 2.645              | 2.121              | <0.000001           | <0.000001 | 0.000007             | 0.000018 | 0.000155               | 0.000215 | 0.000416              | 0.000638 | 0.000002                | 0.000005  | 6.1E-05                  | 0.0002  |
| CHIL3 (N  | 1.889           | 2.134           | 0                  | 1.625              | 0.006754            | 0.002039  | <0.000001            | 0.000005 | 0.003181               | 0.002536 | <0.000001             | 0.000007 | 0.000118                | 0.000089  | <0.000001                | 4E-06   |
| L-Select  | -0.018          | 2.349           | 0.2                | 0.395              | <0.000001           | <0.000001 | 0.322628             | 0.117674 | 0.154802               | 0.083303 | 0.000372              | 0.0006   | 0.001159                | 0.000554  | 0.55514                  | 0.2468  |
| Bmp2      | 0.226           | 1.801           | 1.453              | 0.944              | 0.002445            | 0.000826  | 0.006619             | 0.003529 | 0.057711               | 0.034269 | 0.004751              | 0.004504 | 0.004319                | 0.001693  | 0.03058                  | 0.0199  |
| TGFB1     | 3.127           | 3.225           | 3.287              | 3.137              | 0.000051            | 0.000031  | 0.000335             | 0.000287 | 0.422808               | 0.190512 | 0.011648              | 0.009101 | 0.00142                 | 0.000668  | 0.00095                  | 0.0011  |
| IGF1      | 2.652           | 2.384           | 2.591              | 2.63               | 0.000019            | 0.000013  | 0.007113             | 0.003729 | 0.299485               | 0.14905  | 0.000002              | 0.000014 | 0.000082                | 0.000065  | 0.06733                  | 0.0394  |

**Table3: Specific differentially expressed genes at Day 1**

| Gene name | DAY1            |                 |                    |                    |                      |         |                       |         |                         |         |                       |         |                         |         |                          |         |
|-----------|-----------------|-----------------|--------------------|--------------------|----------------------|---------|-----------------------|---------|-------------------------|---------|-----------------------|---------|-------------------------|---------|--------------------------|---------|
|           | Log 10 (M0-TBL) | Log 10 (M1-TBL) | log 10 (Rux - Imm) | Log 10 (Rux - Del) | D1-M1-TBL vs. M0-TBL |         | D1-Rux-Imm vs. M0-TBL |         | D1-Rux-Delay vs. M0-TBL |         | D1-RUX-Imm vs. M1-TBL |         | D1-Rux-Delay vs. M1-TBL |         | D1-Rux-Delay vs. Rux-Imm |         |
|           |                 |                 |                    |                    | P value              | q value | P value               | q value | P value                 | q value | P value               | q value | P value                 | q value | P value                  | q value |
| Bmp2      | 1.538           | 1.711           | 1.395              | 1.64               | 0.0459               | 0.0201  | 0.1351                | 0.075   | 0.1546                  | 0.0552  | 0.0197                | 0.0092  | 0.3531                  | 0.4584  | 0.041                    | 0.0169  |
| TGFB1     | 3.19            | 2.888           | 3.287              | 2.881              | 7E-06                | 2E-05   | 0.0056                | 0.0047  | 1E-05                   | 2E-05   | 4E-05                 | 4E-05   | 0.6702                  | 0.7002  | 4E-05                    | 4E-05   |
| IGF1      | 2.617           | 2.355           | 2.659              | 2.325              | 4E-05                | 6E-05   | 0.0856                | 0.0497  | 2E-05                   | 3E-05   | 7E-05                 | 7E-05   | 0.0647                  | 0.1638  | 5E-05                    | 5E-05   |

**Table4: Specific differentially expressed genes at Day 6**

| Gene name | DAY6            |                 |                    |                    |                      |         |                       |         |                         |         |                       |         |                         |         |                          |         |
|-----------|-----------------|-----------------|--------------------|--------------------|----------------------|---------|-----------------------|---------|-------------------------|---------|-----------------------|---------|-------------------------|---------|--------------------------|---------|
|           | Log 10 (M0-TBL) | Log 10 (M1-TBL) | log 10 (Rux - Imm) | Log 10 (Rux - Del) | D6-M1-TBL vs. M0-TBL |         | D6-Rux-Imm vs. M0-TBL |         | D6-Rux-Delay vs. M0-TBL |         | D6-RUX-Imm vs. M1-TBL |         | D6-RUX-Delay vs. M1-TBL |         | D6-Rux-Delay vs. Rux-Imm |         |
|           |                 |                 |                    |                    | P value              | q value | P value               | q value | P value                 | q value | P value               | q value | P value                 | q value | P value                  | q value |
| Bmp2      | 0.2257          | 1.801           | 1.453              | 0.9436             | 0.0024               | 0.0008  | 0.0066                | 0.0035  | 0.0577                  | 0.0343  | 0.0048                | 0.0045  | 0.0043                  | 0.0017  | 0.0306                   | 0.0199  |
| TGFB1     | 3.127           | 3.225           | 3.287              | 3.137              | 5E-05                | 3E-05   | 0.0003                | 0.0003  | 0.4228                  | 0.1905  | 0.0116                | 0.0091  | 0.0014                  | 0.0007  | 0.0009                   | 0.0011  |
| IGF1      | 2.652           | 2.384           | 2.591              | 2.63               | 2E-05                | 1E-05   | 0.0071                | 0.0037  | 0.2995                  | 0.1491  | 2E-06                 | 1E-05   | 8E-05                   | 7E-05   | 0.0673                   | 0.0394  |
